# Supplementary material for: Smart nanomicelles with bacterial infection-responsive disassembly for selective antimicrobial applications
Source: Royal Society of Chemistry journal article supplement (doi:10.1039/d0bm01382j), 2021-01-01
Supplement: d0bm01382j1.pdf [file d0bm01382j1.pdf]

## *Electronic Supplementary Information*

### **Smart nanomicelles with bacterial infection-responsive disassembly for selective antimicrobial applications**

**Dicky Pranantyo<sup>1,2</sup>, En-Tang Kang<sup>2\*</sup>, Mary B. Chan-Park<sup>1,3,4\*</sup>**

<sup>1</sup> Centre of Antimicrobial Bioengineering  
School of Chemical and Biomedical Engineering  
Nanyang Technological University  
Singapore 637459

<sup>2</sup> Department of Chemical & Biomolecular Engineering  
National University of Singapore  
4 Engineering Drive 4, Kent Ridge  
Singapore 117585

<sup>3</sup> Lee Kong Chian School of Medicine  
Nanyang Technological University  
59 Nanyang Drive,  
Singapore 636921

<sup>4</sup> School of Physical and Mathematical Sciences  
Nanyang Technological University  
21 Nanyang Link,  
Singapore 637371

\* Corresponding Authors

E-mail: [cheket@nus.edu.sg](mailto:cheket@nus.edu.sg) (E.T.K)

[mbechan@ntu.edu.sg](mailto:mbechan@ntu.edu.sg) (M.B.C.P)

\* ORCID

En-Tang Kang: [0000-0003-0599-7834](https://orcid.org/0000-0003-0599-7834)

Mary B. Chan-Park: [0000-0003-3761-7517](https://orcid.org/0000-0003-3761-7517)

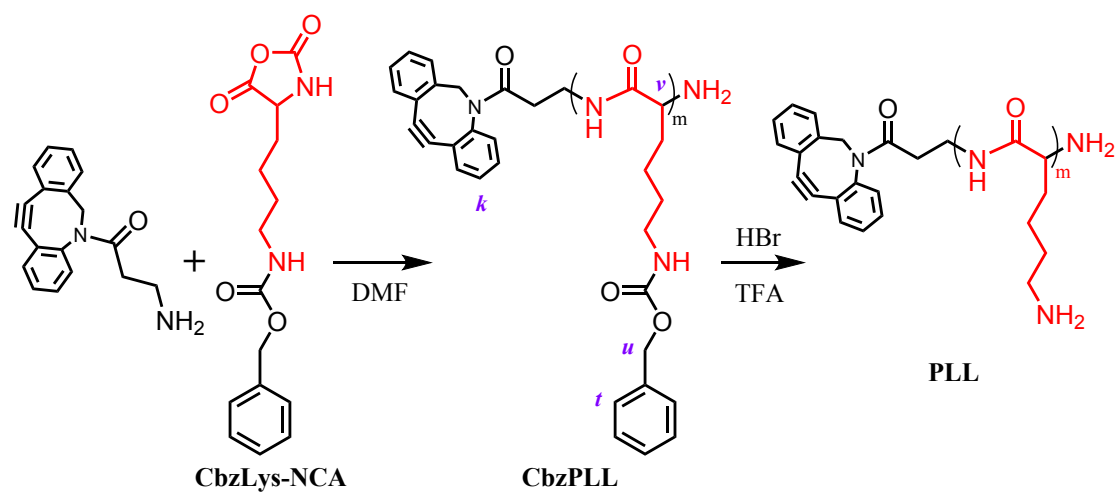

**Figure S1.** Ring-opening polymerization of CbzLys-NCA and subsequent deprotection to obtain ‘clickable’ cyclooctyne-terminated PLL.

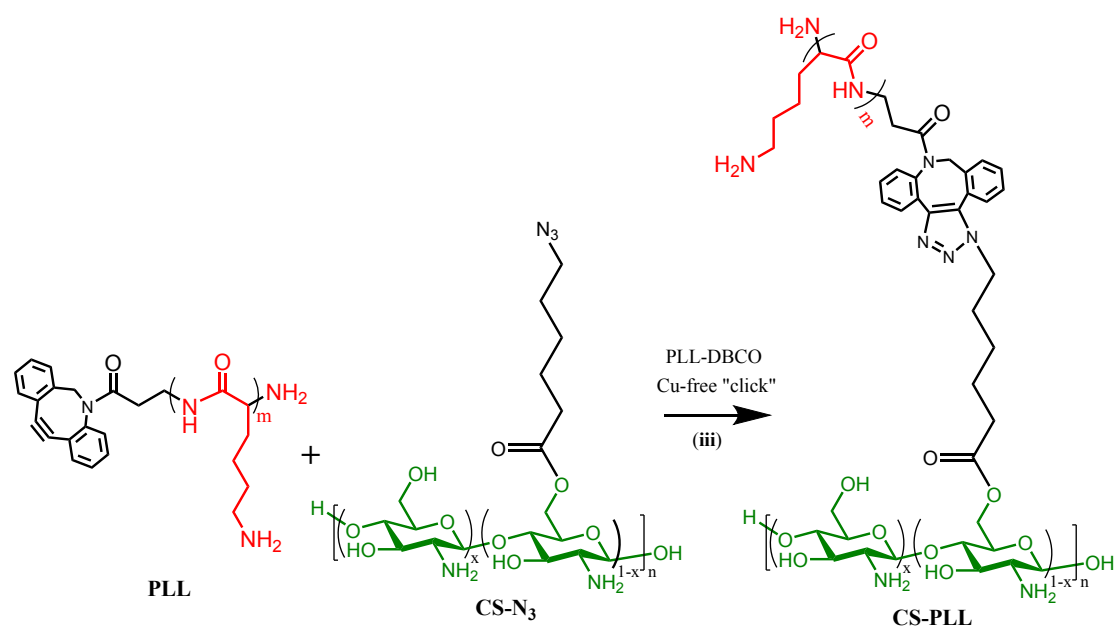

**Figure S2.** Strain-promoted azide-alkyne cycloaddition between cyclooctyne-terminated PLL and CS-N<sub>3</sub> to obtain CS-PLL conjugate.

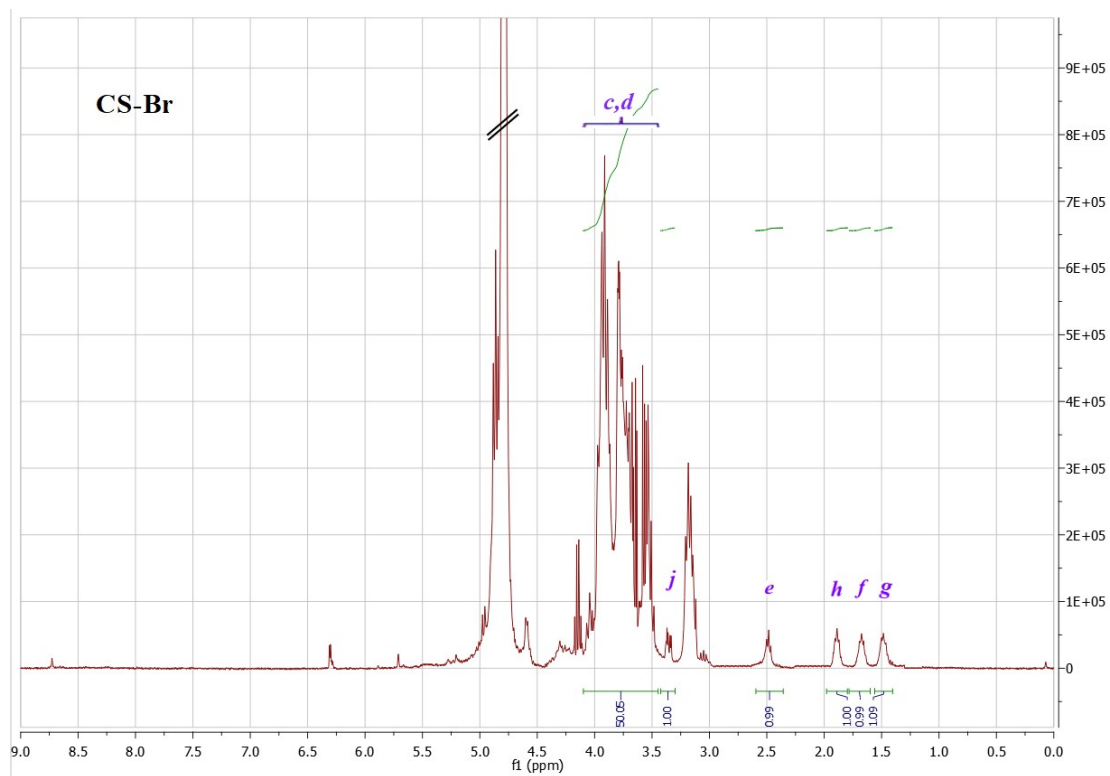

**Figure S3.** Peak integration ratio on the  $^1\text{H}$  NMR spectra of the CS-Br.

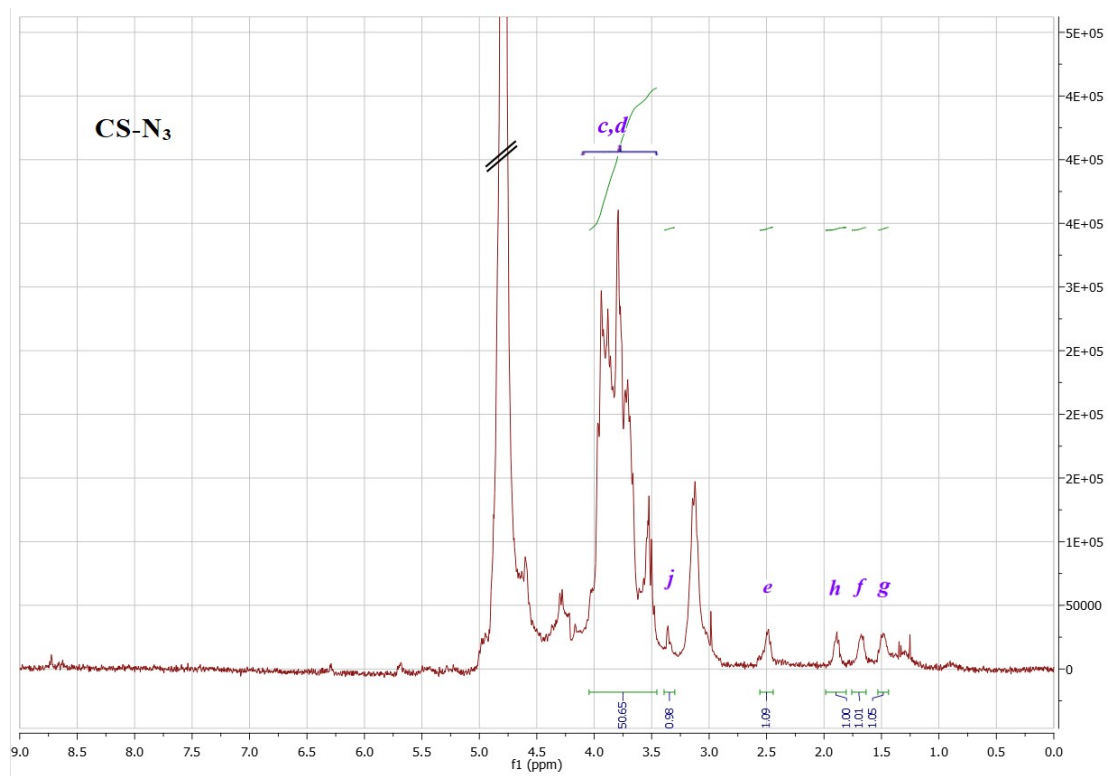

**Figure S4.** Peak integration ratio on the  $^1\text{H}$  NMR spectra of the CS- $\text{N}_3$ .

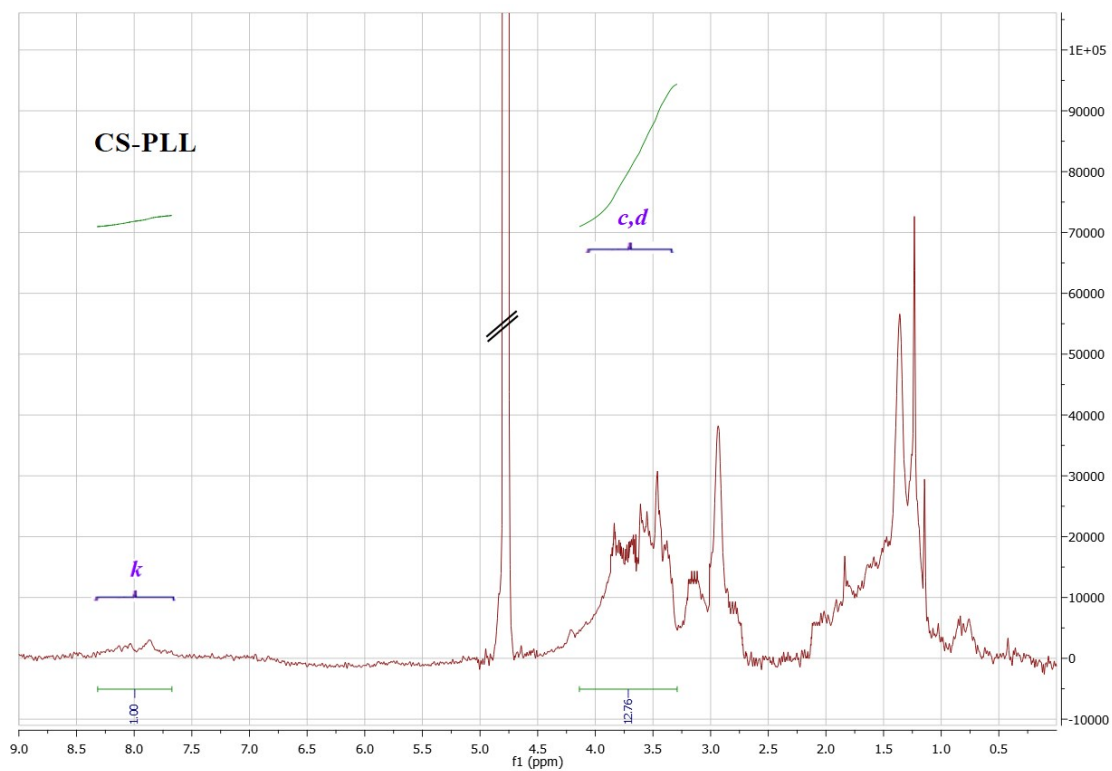

**Figure S5.** Peak integration ratio on the <sup>1</sup>H NMR spectra of the CS-PLL.

### Calculations for degree of modification of the chitosan derivatives

CS-Br

$$= \frac{1}{50.05} \div \frac{2}{5} = 0.04995$$

CS-N<sub>3</sub>

$$= \frac{1}{50.65} \div \frac{2}{5} = 0.04936$$

CS-PLL

$$= \frac{1}{12.76} \div \frac{8}{5} = 0.04898$$

**Table S1.** Molecular weight and polydispersity index of the functionalized chitosan and chitosan-polylysine, and percentage modification of the chitosan derivatives.

| Sample            | $M_w^a$ (g/mol) | $M_n^a$ (g/mol) | $M_w/M_n^a$ | Modification degree of CS <sup>b</sup> |
|-------------------|-----------------|-----------------|-------------|----------------------------------------|
| CS                | 3,572           | 2,251           | 1.58        | -                                      |
| CS-Br             | 3,791           | 2,384           | 1.59        | 5%                                     |
| CS-N <sub>3</sub> | 3,621           | 2,270           | 1.60        | 5%                                     |
| CS-PLL            | 8,763           | 4,596           | 1.90        | 5%                                     |

<sup>a</sup> Molecular weight and polydispersity index were determined from GPC analysis.

<sup>b</sup> Modification degree was determined from peak integration ratio of <sup>1</sup>H NMR spectra.

**Table S2.** Zeta potential values and particle diameters of the polymers and nanomicelles.

| Sample                | Particle diameter <sup>a</sup> (nm) |            | Zeta potential, $\zeta$<br>(mV) |
|-----------------------|-------------------------------------|------------|---------------------------------|
|                       | TEM                                 | DLS        |                                 |
| PLL                   | -                                   | -          | 30.8 ± 3.2                      |
| CS-PLL                | -                                   | -          | 30.3 ± 4.1                      |
| CS-PLL-CA             | -                                   | -          | -23.2 ± 4.9                     |
| CS-PLL/CA NMs, pH 7.4 | 55.2 ± 3.7                          | 76.4 ± 7.1 | 21.4 ± 5.2                      |
| CS-PLL/CA NMs, pH 5.0 | 35.1 ± 25.3                         | 22.9 ± 9.5 | 29.7 ± 6.2                      |

<sup>a</sup> Dry-state and hydrodynamic diameters of the NCs were determined from TEM image and DLS measurement, respectively.

**Table S3.** Bactericidal activity of the PLL, CS-PLL, CS-PLL-CA, CS-PLL/CA NMs at pH 7.4, and CS-PLL/CA NMs at pH 5.0.

| Sample                | MBC, $\mu\text{g/mL}$ |                      |                     |                       |                     |
|-----------------------|-----------------------|----------------------|---------------------|-----------------------|---------------------|
|                       | <i>E. coli</i>        | <i>P. aeruginosa</i> | <i>S. aureus</i>    | <i>S. epidermidis</i> | <i>MRSA</i>         |
| PLL                   | 32                    | 64                   | 32                  | 16                    | 32                  |
| CS-PLL                | 64                    | 128                  | 64                  | 16                    | 64                  |
| CS-PLL-CA             | > 1024 <sup>a</sup>   | > 1024 <sup>a</sup>  | > 1024 <sup>a</sup> | > 1024 <sup>a</sup>   | > 1024 <sup>a</sup> |
| CS-PLL/CA NMs, pH 7.4 | > 1024 <sup>a</sup>   | > 1024 <sup>a</sup>  | > 1024 <sup>a</sup> | > 1024 <sup>a</sup>   | > 1024 <sup>a</sup> |
| CS-PLL/CA NMs, pH 5.0 | 64                    | 128                  | 64                  | 16                    | 64                  |

<sup>a</sup> The values were not observed up to the highest concentrations of compound tested (1024  $\mu\text{g/mL}$ ).
